# Supplementary material
Source: PubMed Central journal article supplement (PMC6037189)
Supplement: Supp_Figure1.pdf [file Supp_Figure1.pdf]

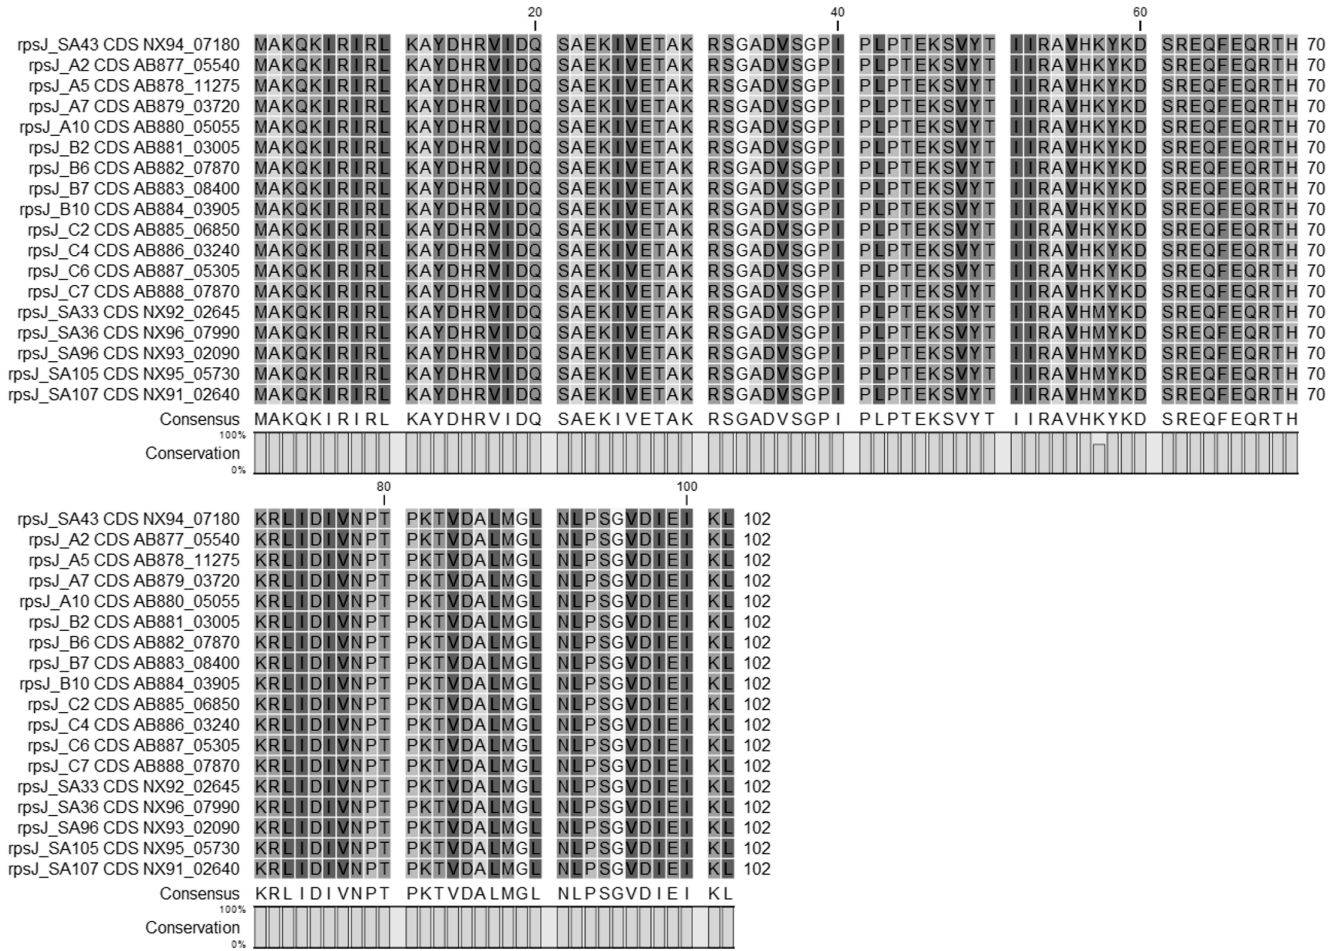

Figure S1 – Alignment of the S10 protein sequence showing the K57M amino acid substitution in the clinical MRSA TGC-S strains SA33, SA36, SA96, SA105 and SA107 (MIC = 0.25 mg/L).
