# Supplementary material
Source: PubMed Central journal article supplement (PMC6037189)
Supplement: Supp_Figure2.pdf [file Supp_Figure2.pdf]

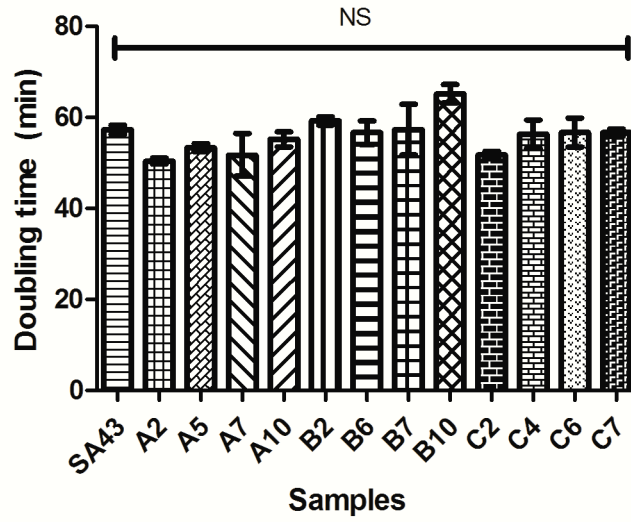

Figure S2 – Doubling times of *in vitro*-selected MRSA strains in cation-adjusted Mueller Hinton broth at 37 °C. Doubling time was calculated from log-phase optical densities using a linear regression. NS, not significant
