# Supplementary material
Source: PubMed Central journal article supplement (PMC6037189)
Supplement: Supp_Table1.pdf [file Supp_Table1.pdf]

Supplementary Data

Table S1 - Table of assembly statistics for the sequenced genomes: strain name, number of reads, number of contigs, contig N50, genome size, fold coverage, and GenBank assembly ID.

| Strain name | Number of reads | Number of contigs | Contig N50             | Genome size (Mb) | Fold coverage | GenBank accession |
|-------------|-----------------|-------------------|------------------------|------------------|---------------|-------------------|
| SA43        | 3,409,873       | 40                | 1,536,665<br>GC%=32.92 | 2.82             | 284X          | JSBI000000000     |
| A2          | 4,088,464       | 66                | 1,440,939<br>GC%=33.05 | 2.82             | 325X          | LELL000000000     |
| A5          | 675,092         | 89                | 1,409,311<br>GC%=33.01 | 2.81             | 46X           | LELM000000000     |
| A7          | 2,263,463       | 94                | 1,414,869<br>GC%=33.09 | 2.80             | 177X          | LELN000000000     |
| A10         | 1,971,416       | 45                | 1,478,751<br>GC%=32.92 | 2.82             | 145X          | LELO000000000     |
| B2          | 2,860,230       | 39                | 1,556,090<br>GC%=32.92 | 2.82             | 209X          | LELP000000000     |
| B6          | 2,982,466       | 69                | 1,412,843<br>GC%=32.93 | 2.82             | 219X          | LELQ000000000     |
| B7          | 2,671,694       | 55                | 1,432,992<br>GC%=32.92 | 2.82             | 205X          | LELR000000000     |

---

|     |           |     |                        |      |      |              |
|-----|-----------|-----|------------------------|------|------|--------------|
| B10 | 790,468   | 45  | 1,568,876<br>GC%=32.97 | 2.82 | 61X  | LELS00000000 |
| C2  | 1,493,209 | 80  | 1,474,449<br>GC%=33.08 | 2.79 | 115X | LELT00000000 |
| C4  | 254,73    | 334 | 1,308,960<br>GC%=33.49 | 2.61 | 17X  | LELU00000000 |
| C6  | 1,534,853 | 51  | 1,454,050<br>GC%32.98  | 2.82 | 110X | LELV00000000 |
| C7  | 1,749,922 | 53  | 1,464,338<br>GC%=32.87 | 2.82 | 114X | LELW00000000 |

---
