# Supplementary material
Source: PubMed Central journal article supplement (PMC6037189)
Supplement: Supp_Table2.pdf [file Supp_Table2.pdf]

Table S2 - Levels of *mepA* expression measured by quantitative real-time PCR. *In vitro*-selected strains were normalized to SA43. Mean expression values and standard deviations were calculated from triplicates of two independent experiments. Statically significant variations in expression were calculated with ANOVA ( $P < 0.05$ ).

| Strain | Mean expression | Standard deviation | Significant $P < 0.05$ |
|--------|-----------------|--------------------|------------------------|
| SA43   | 1.00            | 0.00               | -                      |
| A2     | 4.11            | 0.84               | NS                     |
| A5     | 199.82          | 13.40              | ***                    |
| A7     | 236.18          | 31.51              | ***                    |
| A10    | 178.50          | 19.73              | ***                    |
| B2     | 2.01            | 0.24               | NS                     |
| B6     | 79.08           | 4.94               | *                      |
| B7     | 298.32          | 38.08              | ***                    |
| B10    | 190.82          | 18.33              | ***                    |
| C2     | 2.10            | 0.30               | NS                     |
| C4     | 211.92          | 14.76              | ***                    |
| C6     | 263.37          | 42.74              | ***                    |
| C7     | 45.22           | 0.72               | NS                     |
